# Supplementary material for: Unravelling the Biological Potential of Pinus pinaster Bark Extracts
Source: PubMed Central journal article supplement (PMC7222395; doi:10.3390/antiox9040334), 2020-04-20
Supplement: antioxidants-09-00334-s001.pdf [file antioxidants-09-00334-s001.pdf]

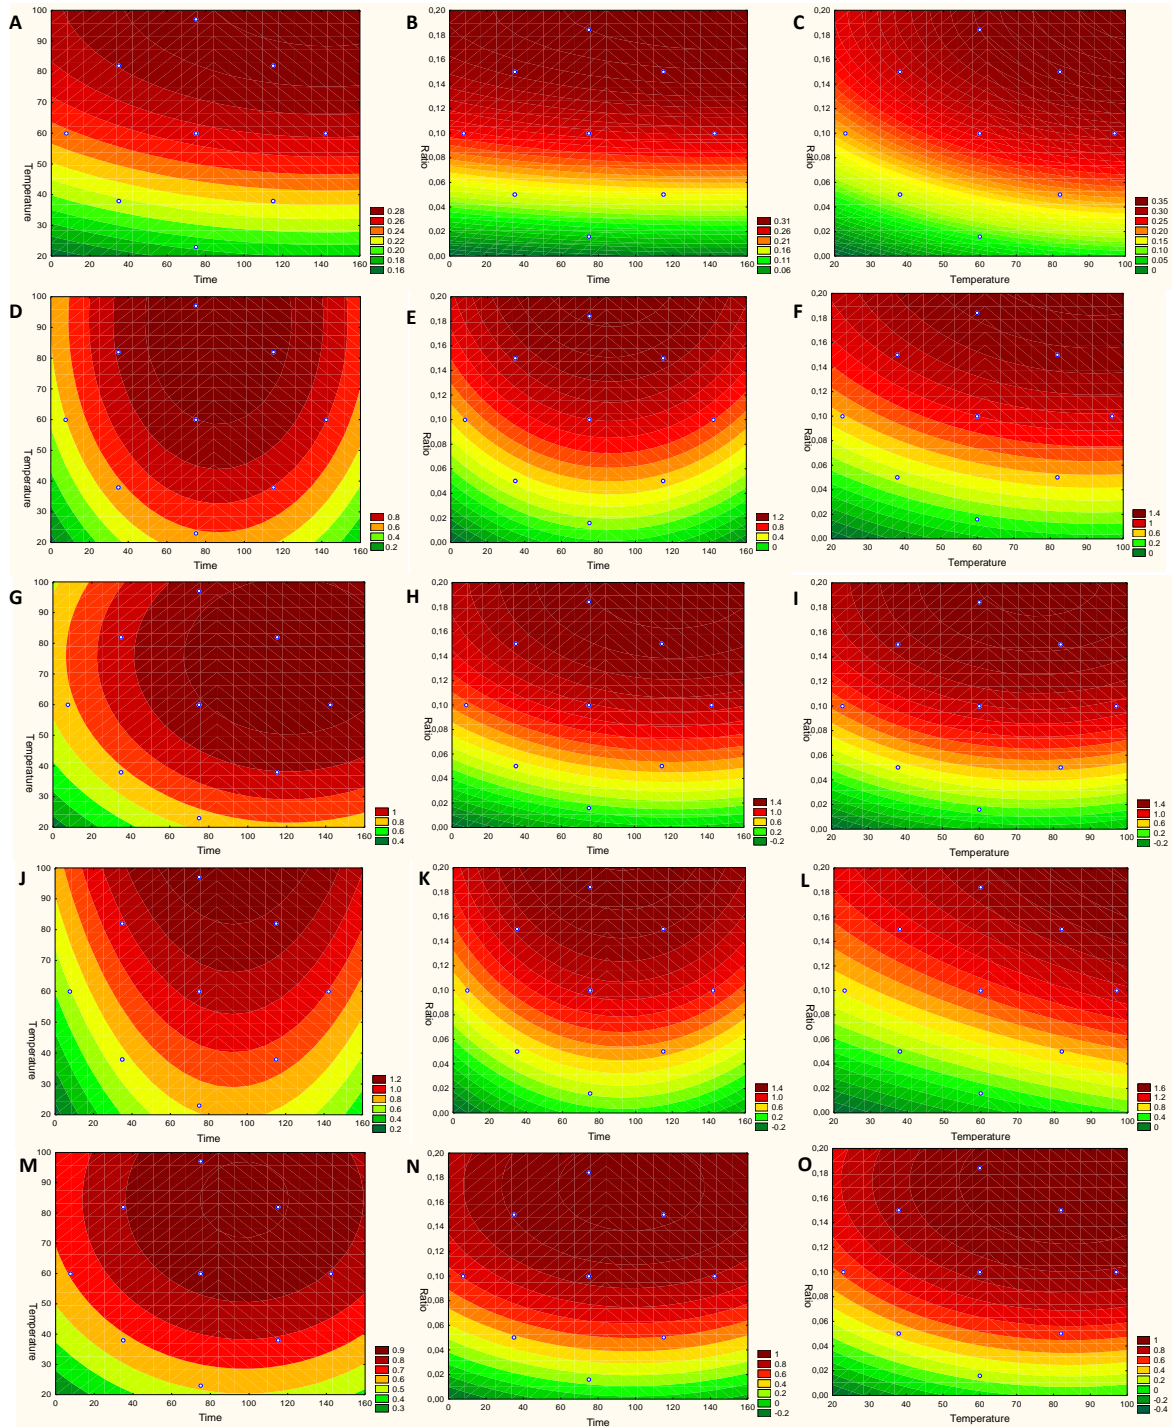

**Figure S1.** Contour line plots representing the antioxidant activity (FRAP assay) under different conditions of extraction (time, temperature, liquid-solid ratio) of the tested experimental models. EtOH 0% (A,B,C), EtOH 30% (D,E,F), EtOH 50% (G,H,I), EtOH 70% (J,K,L), EtOH 90% (M,N,O).

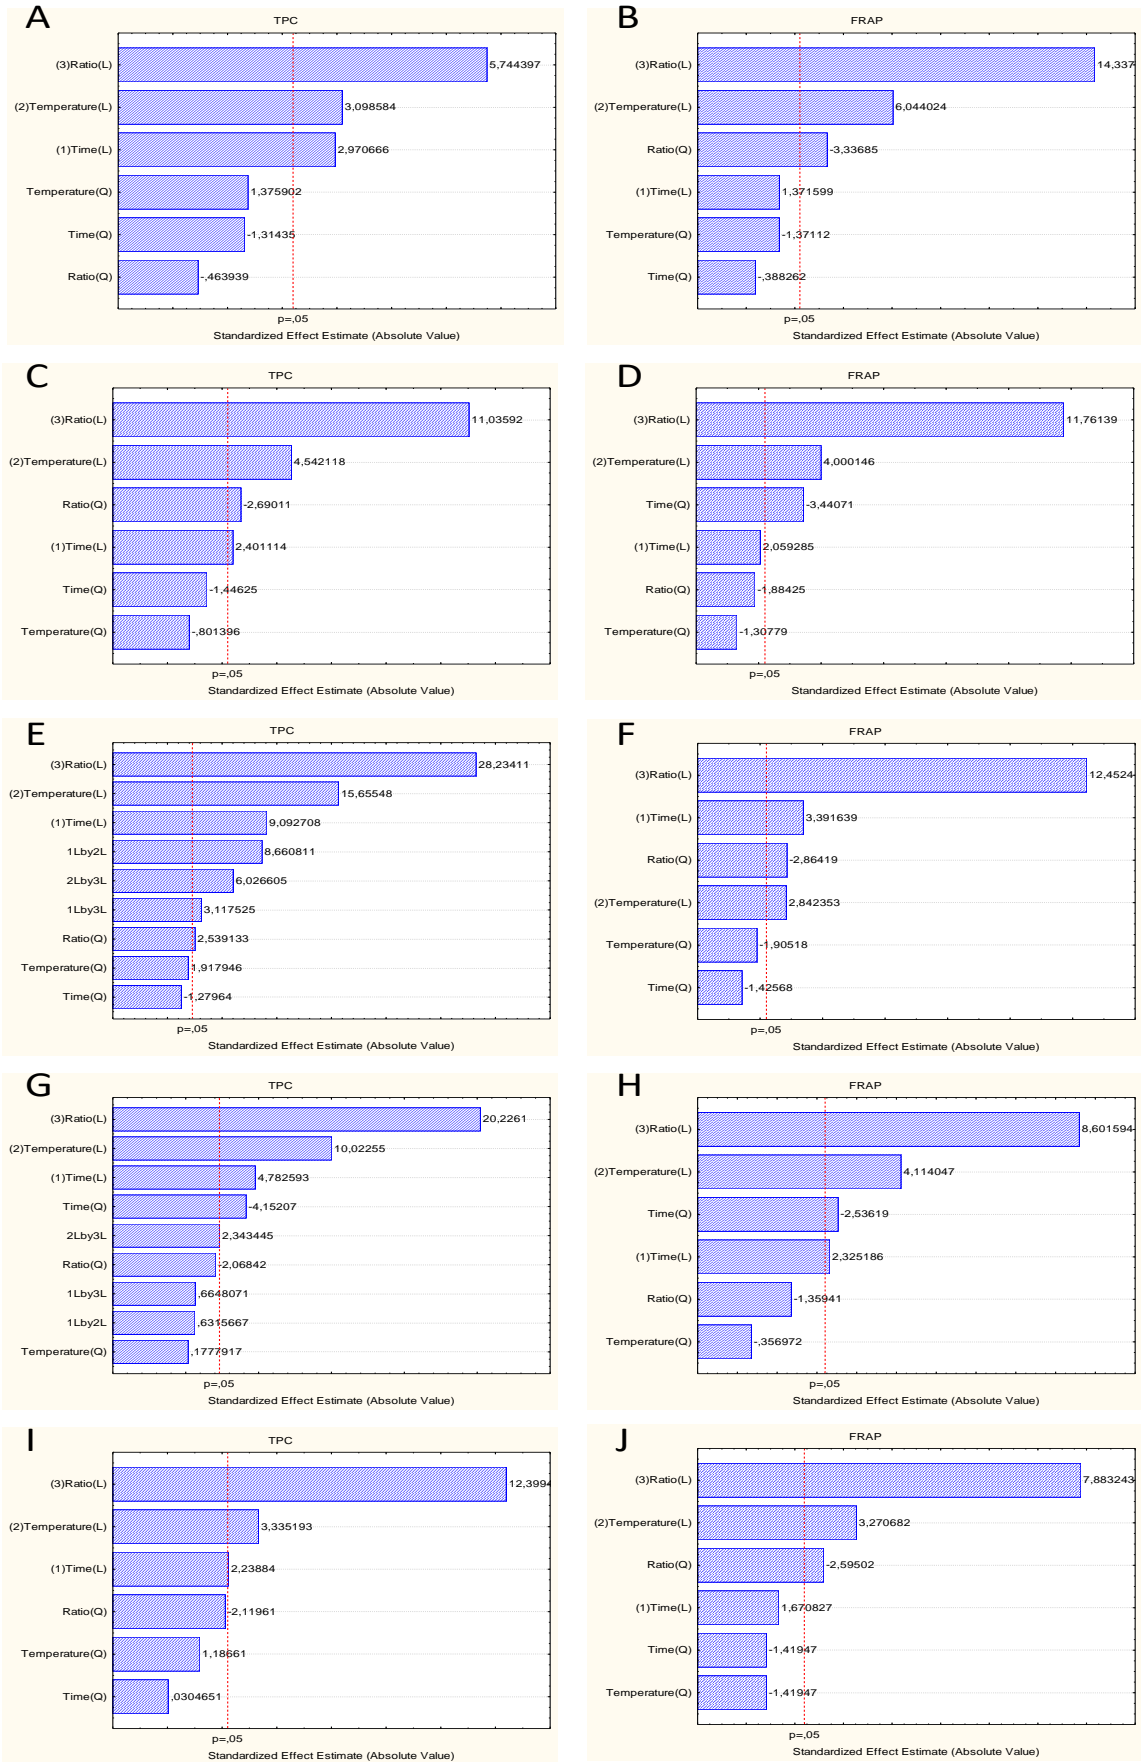

**Figure S2.** Pareto chart for the effects of time ( $x_1$ ), temperature ( $x_2$ ), liquid-solid ratio ( $x_3$ ), and possible interactions, on the total phenolic content (TPC) (A,C,E,G,I) and FRAP antioxidant activity (B,D,F,H,J) of the tested experimental models. EtOH 0% (A,B), EtOH 30% (C,D), EtOH 50% (E,F), EtOH 70% (G,H), EtOH 90% (I,J). L and Q correspond to the effects at linear and quadratic levels, respectively.

**Table S1.** Factors and interaction effects of time ( $x_1$ ), temperature ( $x_2$ ) and liquid-solid ratio ( $x_3$ ) on total phenolic content (TPC) and reducing antioxidant activity (FRAP) of the tested experimental model (EtOH 0%, EtOH 30%, EtOH 50%, EtOH 70% and EtOH 90%).

| Model                         | Response | Factor             | SS       | df     | MS       | F-test  | p-value |
|-------------------------------|----------|--------------------|----------|--------|----------|---------|---------|
| EtOH 0%<br>(H <sub>2</sub> O) | TPC      | (1)Time (L)        | 255.635  | 1      | 255.635  | 8.825   | 0.013   |
|                               |          | Time (Q)           | 50.042   | 1      | 50.042   | 1.728   | 0.215   |
|                               |          | (2)Temperature (L) | 278.124  | 1      | 278.125  | 9.601   | 0.010   |
|                               |          | Temperature (Q)    | 54.838   | 1      | 54.839   | 1.893   | 0.196   |
|                               |          | (3)Ratio (L)       | 955.876  | 1      | 955.876  | 32.999  | <0.001  |
|                               |          | Ratio (Q)          | 6.235    | 1      | 6.235    | 0.215   | 0.652   |
|                               |          | Error              | 318.644  | 11     | 28.968   |         |         |
|                               |          | Total SS           | 1947.954 | 17     |          |         |         |
|                               | FRAP     | (1)Time (L)        | 0.001    | 1      | 0.001    | 1.881   | 0.198   |
|                               |          | Time (Q)           | 0.001    | 1      | 0.000    | 0.151   | 0.705   |
|                               |          | (2)Temperature (L) | 0.014    | 1      | 0.013    | 36.530  | <0.001  |
|                               |          | Temperature (Q)    | 0.001    | 1      | 0.001    | 1.880   | 0.198   |
|                               |          | (3)Ratio (L)       | 0.076    | 1      | 0.076    | 205.571 | <0.001  |
|                               |          | Ratio (Q)          | 0.004    | 1      | 0.004    | 11.135  | 0.006   |
| Error                         |          | 0.004              | 11       | 0.001  |          |         |         |
|                               | Total SS | 0.098              | 17       |        |          |         |         |
| EtOH 30%                      | TPC      | (1)Time (L)        | 443.91   | 1      | 443.910  | 5.765   | 0.035   |
|                               |          | Time (Q)           | 161.05   | 1      | 161.049  | 2.092   | 0.176   |
|                               |          | (2)Temperature (L) | 1588.50  | 1      | 1588.498 | 20.631  | 0.001   |
|                               |          | Temperature (Q)    | 49.45    | 1      | 49.450   | 0.642   | 0.440   |
|                               |          | (3)Ratio (L)       | 9377.50  | 1      | 9377.512 | 121.792 | <0.001  |
|                               |          | Ratio (Q)          | 557.20   | 1      | 557.199  | 7.237   | 0.021   |
|                               |          | Error              | 846.96   | 11     | 76.996   |         |         |
|                               |          | Total SS           | 12877.44 | 17     |          |         |         |
|                               | FRAP     | (1)Time (L)        | 0.050    | 1      | 0.050    | 4.241   | 0.064   |
|                               |          | Time (Q)           | 0.141    | 1      | 0.141    | 11.839  | 0.006   |
|                               |          | (2)Temperature (L) | 0.190    | 1      | 0.190    | 16.001  | 0.002   |
|                               |          | Temperature (Q)    | 0.020    | 1      | 0.020    | 1.710   | 0.218   |
|                               |          | (3)Ratio (L)       | 1.645    | 1      | 1.645    | 138.330 | <0.001  |
|                               |          | Ratio (Q)          | 0.042    | 1      | 0.0422   | 3.550   | 0.086   |
| Error                         |          | 0.131              | 11       | 0.0122 |          |         |         |
|                               | Total SS | 2.177              | 17       |        |          |         |         |
| EtOH 50%                      | TPC      | (1)Time (L)        | 787.87   | 1      | 787.867  | 82.677  | <0.001  |
|                               |          | Time (Q)           | 15.60    | 1      | 15.604   | 1.638   | 0.237   |
|                               |          | (2)Temperature (L) | 2335.60  | 1      | 2335.602 | 245.094 | <0.001  |
|                               |          | Temperature (Q)    | 35.05    | 1      | 35.054   | 3.679   | 0.091   |
|                               |          | (3)Ratio (L)       | 7596.51  | 1      | 7596.514 | 797.165 | <0.001  |
|                               |          | Ratio (Q)          | 61.44    | 1      | 61.438   | 6.447   | 0.035   |
|                               |          | 1L by 2L           | 714.80   | 1      | 714.798  | 75.010  | <0.001  |

|                 |                    |             |         |          |         |        |
|-----------------|--------------------|-------------|---------|----------|---------|--------|
|                 | 1L by 3L           | 92.62       | 1       | 92.616   | 9.719   | 0.014  |
|                 | 2L by 3L           | 346.11      | 1       | 346.108  | 36.320  | <0.001 |
|                 | Error              | 76.24       | 8       | 9.529    |         |        |
|                 | Total SS           | 12073.57    | 17      |          |         |        |
|                 | (1)Time (L)        | 0.160       | 1       | 0.160    | 11.503  | 0.006  |
|                 | Time (Q)           | 0.028       | 1       | 0.028    | 2.033   | 0.181  |
| <b>FRAP</b>     | (2)Temperature (L) | 0.113       | 1       | 0.113    | 8.079   | 0.016  |
|                 | Temperature (Q)    | 0.051       | 1       | 0.051    | 3.630   | 0.083  |
|                 | (3)Ratio (L)       | 2.159       | 1       | 2.159    | 155.062 | <0.001 |
|                 | Ratio (Q)          | 0.114       | 1       | 0.114    | 8.207   | 0.015  |
|                 | Error              | 0.153       | 11      | 0.014    |         |        |
|                 | Total SS           | 2.730       | 17      |          |         |        |
|                 |                    | (1)Time (L) | 414.02  | 1        | 414.024 | 22.873 |
|                 | Time (Q)           | 312.05      | 1       | 312.053  | 17.240  | 0.003  |
| <b>EtOH 70%</b> | (2)Temperature (L) | 1818.26     | 1       | 1818.258 | 100.452 | <0.001 |
|                 | Temperature (Q)    | 0.57        | 1       | 0.572    | 0.032   | 0.863  |
|                 | (3)Ratio (L)       | 7404.97     | 1       | 7404.968 | 409.095 | <0.001 |
|                 | Ratio (Q)          | 77.44       | 1       | 77.442   | 4.278   | 0.073  |
|                 | 1L by 2L           | 7.22        | 1       | 7.220    | 0.399   | 0.545  |
|                 | 1L by 3L           | 8.00        | 1       | 8.000    | 0.442   | 0.524  |
|                 | 2L by 3L           | 99.40       | 1       | 99.405   | 5.492   | 0.047  |
|                 | Error              | 144.81      | 8       | 18.101   |         |        |
|                 | Total SS           | 10266.68    | 17      |          |         |        |
|                 |                    | (1)Time (L) | 0.113   | 1        | 0.113   | 5.406  |
|                 | Time (Q)           | 0.134       | 1       | 0.134    | 6.432   | 0.027  |
| <b>FRAP</b>     | (2)Temperature (L) | 0.352       | 1       | 0.352    | 16.925  | 0.002  |
|                 | Temperature (Q)    | 0.003       | 1       | 0.003    | 0.127   | 0.728  |
|                 | (3)Ratio (L)       | 1.540       | 1       | 1.540    | 73.987  | <0.001 |
|                 | Ratio (Q)          | 0.038       | 1       | 0.038    | 1.848   | 0.201  |
|                 | Error              | 0.229       | 11      | 0.021    |         |        |
|                 | Total SS           | 2.384       | 17      |          |         |        |
|                 |                    | (1)Time (L) | 246.668 | 1        | 246.668 | 5.012  |
|                 | Time (Q)           | 0.046       | 1       | 0.046    | 0.001   | 0.976  |
| <b>EtOH 90%</b> | (2)Temperature (L) | 547.405     | 1       | 547.405  | 11.124  | 0.007  |
|                 | Temperature (Q)    | 69.292      | 1       | 69.292   | 1.408   | 0.260  |
|                 | (3)Ratio (L)       | 7566.128    | 1       | 7566.128 | 153.748 | <0.001 |
|                 | Ratio (Q)          | 221.094     | 1       | 221.094  | 4.493   | 0.058  |
|                 | Error              | 541.326     | 11      | 49.211   |         |        |
|                 | Total SS           | 9261.411    | 17      |          |         |        |
|                 |                    | (1)Time (L) | 0.042   | 1        | 0.042   | 2.792  |
| <b>FRAP</b>     | Time (Q)           | 0.030       | 1       | 0.030    | 2.015   | 0.183  |
|                 | (2)Temperature (L) | 0.162       | 1       | 0.162    | 10.698  | 0.007  |

|                 |       |    |       |        |        |
|-----------------|-------|----|-------|--------|--------|
| Temperature (Q) | 0.030 | 1  | 0.030 | 2.015  | 0.183  |
| (3)Ratio (L)    | 0.940 | 1  | 0.940 | 62.146 | <0.001 |
| Ratio (Q)       | 0.102 | 1  | 0.102 | 6.734  | 0.025  |
| Error           | 0.166 | 11 | 0.015 |        |        |
| Total SS        | 1.434 | 17 |       |        |        |

L and Q correspond to the effects at linear and quadratic levels, respectively.  
SS: sum of squares; MS: mean square; df: degrees of freedom.

**Table S2.** Quadratic models describing the responses variation of total phenolic compounds (TPC) and antioxidant activity (FRAP) in function of independent variables of the tested experimental model (EtOH 0%, EtOH 30%, EtOH 50%, EtOH 70% and EtOH 90%) and their correspondent  $R^2$  coefficients.

| Response          | Model    | Mathematical models <sup>c</sup>                                                           | $R^2$ |
|-------------------|----------|--------------------------------------------------------------------------------------------|-------|
| TPC <sup>a</sup>  | EtOH 0%  | $27.35 + 4.33x_1 + 4.51x_2 + 8.37x_3$                                                      | 0.84  |
|                   | EtOH 30% | $89.06 + 5.70x_1 + 10.78x_2 + 26.20x_3 - 6.64x_3^2$                                        | 0.93  |
|                   | EtOH 50% | $93.55 + 7.60x_1 + 13.08x_2 + 23.58x_3 + 2.20x_3^2 + 9.45x_1x_2 + 3.40x_1x_3 + 6.58x_2x_3$ | 0.99  |
|                   | EtOH 70% | $101.26 + 5.51x_1 + 11.54x_2 + 23.29x_3 - 0.10x_1^2 + 3.53x_2x_3$                          | 0.99  |
|                   | EtOH 90% | $83.37 + 4.25x_1 + 6.33x_2 + 23.54x_3$                                                     | 0.94  |
| FRAP <sup>b</sup> | EtOH 0%  | $0.26 + 0.03x_2 + 0.07x_3 - 0.02x_3^2$                                                     | 0.96  |
|                   | EtOH 30% | $0.90 + 0.12x_2 + 0.35x_3 - 0.11x_1^2$                                                     | 0.94  |
|                   | EtOH 50% | $1.09 + 0.11x_1 + 0.09x_2 + 0.40x_3 - 0.10x_3^2$                                           | 0.94  |
|                   | EtOH 70% | $1.04 + 0.09x_1 + 0.16x_2 + 0.34x_3 - 0.10x_1^2$                                           | 0.90  |
|                   | EtOH 90% | $0.84 + 0.11x_2 + 0.26x_3 - 0.09x_3^2$                                                     | 0.88  |

<sup>a</sup> Total Phenolic Content (mg GAE/g PB); <sup>b</sup> Ferric Reducing Antioxidant Power (mmol Fe<sup>2+</sup>/g PB); <sup>c</sup>  $x_1$ : time;  $x_2$ : temperature;  $x_3$ : solid-liquid ratio. The equations are expressed in terms of coded values (-1, 0, +1).
